# Supplementary material
Source: publisher site journal article supplement (https://www.dovepress.com/article/342612)
Supplement: Supplementary file 1 [file get_supplementary_file.php]

|                 |        |                 |               |          |                      |
|-----------------|--------|-----------------|---------------|----------|----------------------|
| ABL1            | CDK12  | FGF14           | JAK1          | NKX2-1   | RUNX1                |
| ARAF            | CDK4   | FGF19           | JAK2          | NOTCH1   | RUNX1T1              |
| ABL2            | CDK6   | FGF23           | JAK3          | NOTCH2   | SDHA                 |
| ARFRP1          | CDK8   | FGF3            | JUN           | NOTCH3   | SDHB                 |
| ACVR1B          | CDKN1A | FGF4            | KAT6A (MYST3) | NPM1     | SDHC                 |
| AKT1            | CDKN2A | FGFR1           | KDM5A         | NSD1     | SETD2                |
| ARID1B          | CDKN2B | FGFR2           | KDM5C         | NTRK1    | SF3B1                |
| AKT2            | CDKN2C | FGFR3           | KDM6A         | NTRK2    | SLIT2                |
| ARID2           | CEBPA  | FGFR4           | KDR           | NTRK3    | SMAD2                |
| AKT3            | CHD2   | FH              | KEAP1         | NUP93    | SMAD3                |
| ASXL1           | CHD4   | FLCN            | KEL           | PAK3     | SMAD4                |
| ALK             | CHEK1  | FLT1            | KIT           | PALB2    | SMARCA4              |
| ATM             | CHEK2  | FLT3            | KLHL6         | PARK2    | SMARCB1              |
| AMER1 (FAM123B) | CIC    | FLT4            | KMT2A         | PAX5     | SMO                  |
| ATR             | CRKL   | FOXP1           | KMT2C (MLL3)  | PDCD1LG2 | SOCS1                |
| ATRX            | CSF1R  | FUBP1           | KMT2D (MLL2)  | PDGFRB   | SOX2                 |
| AURKA           | CTNNA1 | GATA1           | KRAS          | PIK3C2B  | SPEN                 |
| AURKB           | CTNNB1 | GATA2           | LMO1          | PIK3CA   | SPOP                 |
| AXIN1           | CUL3   | GATA3           | LRP1B         | PIK3CB   | SPTA1                |
| AXL             | CYLD   | GATA4           | LYN           | PIK3CG   | SRC                  |
| BAP1            | DAXX   | GATA6           | LZTR1         | PIK3R1   | STAG2                |
| BARD1           | DDR2   | GID4 (C17orf39) | MAGI2         | PIK3R2   | STAT3                |
| BCL2L1          | DNMT3A | GLI1            | MAP2K2        | PMS2     | STK11                |
| BCL2L2          | DOT1L  | GNA11           | MAP2K4        | POLD1    | SUFU                 |
| BCL6            | EGFR   | GNA13           | MAP3K1        | POLE     | SYK                  |
| BCOR            | EP300  | GNAQ            | MCL1          | PPP2R1A  | TAF1                 |
| BCORL1          | EPHA3  | GNAS            | MDM2          | PRDM1    | TBX3                 |
| BLM             | EPHA5  | GPR124          | MDM4          | PREX2    | TERC                 |
| BRAF            | EPHA7  | GRIN2A          | MED12         | PRKAR1A  | TERT (promoter only) |
| BRCA1           | EPHB1  | GRM3            | MEF2B         | PRKCI    | TET2                 |
| BRCA2           | ERBB2  | GSK3B           | MEN1          | PRKDC    | TGFBR2               |
| BRD4            | ERBB3  | H3F3A           | MET           | PRSS8    | TNFAIP3              |
| BRIP1           | ERBB4  | HGF             | MITF          | PTCH1    | TNFRSF14             |
| BTG1            | ERG    | HNF1A           | MLH1          | PTEN     | TOP1                 |
| BTK             | ERRFI1 | HRAS            | MPL           | PTPN11   | TOP2A                |
| C11orf30 (EMSY) | ESR1   | HSD3B1          | MRE11A        | QKI      | TP53                 |
| CARD11          | FAM46C | IDH1            | MSH6          | RAD50    | TSC2                 |
| CBFB            | FANCA  | IDH2            | MTOR          | RAD51    | TSHR                 |
| CBL             | FANCC  | IGF1R           | MUTYH         | RAF1     | U2AF1                |
| CCND1           | FANCD2 | IGF2            | MYC           | RANBP2   | VEGFA                |
| CCND2           | FANCE  | IKBKE           | MYCL (MYCL1)  | RARA     | VHL                  |
| CCNE1           | FANCG  | IL7R            | MYCN          | RBM10    | WT1                  |
| CD274           | FANCL  | INHBA           | MYD88         | RET      | XPO1                 |

|       |       |        |        |        |        |
|-------|-------|--------|--------|--------|--------|
| CD79A | FAS   | INPP4B | NF1    | RICTOR | ZBTB2  |
| CD79B | FAT1  | IRF2   | NF2    | RNF43  | ZNF217 |
| CDC73 | FBXW7 | IRF4   | NFE2L2 | ROS1   | ZNF703 |
| CDH1  | FGF10 | IRS2   | NFKBIA | RPTOR  |        |

DNA Gene List: For the Detection of Select Rearrangements

|       |       |       |        |        |         |
|-------|-------|-------|--------|--------|---------|
| ALK   | BRCA2 | ETV5  | KIT    | NTRK1  | RET     |
| BCL2  | BRD4  | ETV6  | MSH2   | NTRK2  | ROS1    |
| BCR   | EGFR  | FGFR1 | MYB    | PDGFRA | TMPRSS2 |
| BRAF  | ETV1  | FGFR2 | MYC    | RAF1   |         |
| BRCA1 | ETV4  | FGFR3 | NOTCH2 | RARA   |         |

Supplementary Table. DNA Gene List: Entire Coding Sequence for the Detection of Base Substitutions, Insertion/Deletions, and Copy Number Alterations

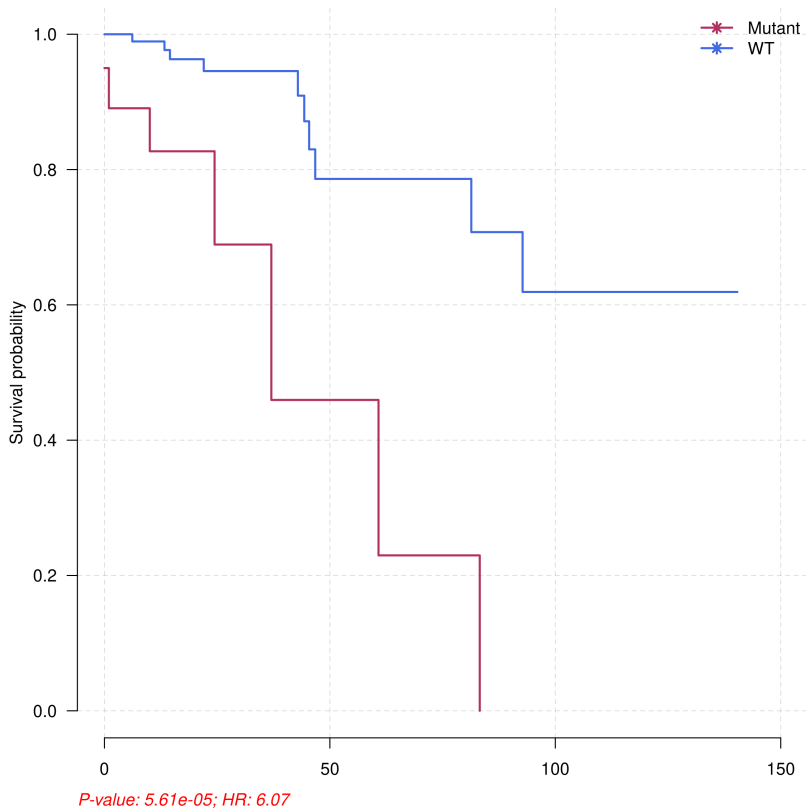

Supplementary Figure 1. Survival in FBXW7 mutated vs FBXW7 wild type stage II CRC COAD TCGA

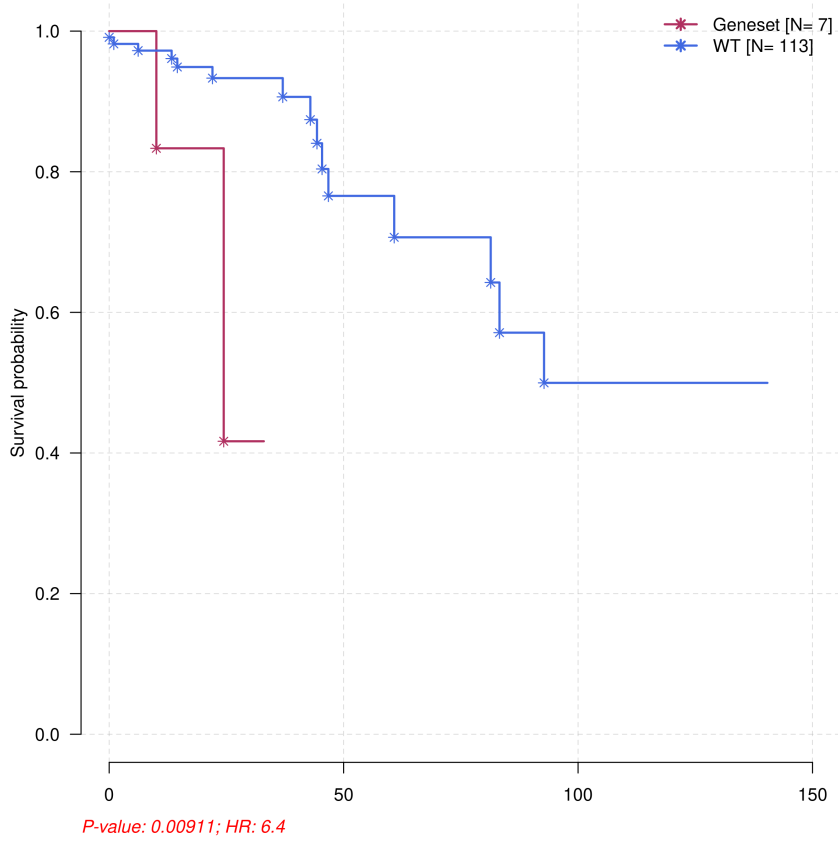

Supplementary Figure 2. Correlation between survival and co-occurred mutation status of FBXW7- TP53 in stage II CRC COAD TCGA
